# Supplementary material
Source: HighWire-hosted journal article supplement (http://molpharm.aspetjournals.org/highwire/filestream/76335/field_highwire_adjunct_files/2/10.1124_mol.104.005496_SUPP_TABLE_3.pdf)
Supplement: 10.1124_mol.104.005496_SUPP_TABLE_3.pdf [file 10.1124_mol.104.005496_SUPP_TABLE_3.pdf]

SUPPLEMENTAL TABLE 3

WY-responsive genes regulated in an opposite manner in wild-type and PPAR $\alpha$ -null mice

Anderson SP, Dunn C, Laughter A, Yoon L, Swanson C, Stulnig TM, Steffensen KR, Chandraratna RAS, Gustafsson J-A, and Corton JC (2004)  
*Mol Pharmacol* doi:10.1124/mol.104.005496.

| Gene Name     | Gene Description                                                               | Sequence    |             | WT-WY  | P-value        | KO-WY | P-value     |
|---------------|--------------------------------------------------------------------------------|-------------|-------------|--------|----------------|-------|-------------|
|               |                                                                                | Code        | Accession # |        |                |       |             |
| Phlda1        | pleckstrin homology-like domain, family A, member 1<br>EST                     | 160829_at   | U44088      | 2.95   | 0.0000159      | -3.45 | 0           |
|               |                                                                                | 99849_at    | C85523      | 1.44   | 0.000000754    | -1.43 | 0           |
| Fmo5          | flavin containing monooxygenase 5                                              | 160088_at   | U90535      | 1.4    | 0 <sup>a</sup> | -1.62 | 0.000000772 |
| Bckdha        | branched chain ketoacid dehydrogenase E1, alpha polypeptide                    | 96035_at    | L47335      | 1.4    | 0.000329       | -1.39 | 0.000488    |
| Cox7c         | cytochrome c oxidase, subunit VIIc                                             | 99661_r_at  | X52940      | 1.34   | 2.81E-12       | -1.22 | 1.37E-08    |
| Uqcr-pending  | ubiquinol-cytochrome c reductase subunit                                       | 99618_at    | AI853523    | 1.31   | 0.000273       | -1.2  | 0.0000736   |
| Prodh2        | proline dehydrogenase (oxidase) 2                                              | 103452_at   | AA675075    | 1.3    | 0.0000178      | -1.3  | 0           |
| Slc25a5       | solute carrier family 25, member 5                                             | 100617_at   | U10404      | 1.19   | 0.00071        | -1.2  | 0.0000558   |
| Qpc-pending   | low molecular mass ubiquinone-binding protein                                  | 93844_at    | AW061302    | 1.17   | 0.0000124      | -1.12 | 0.000264    |
| Atp5l         | ATP synthase, H <sup>+</sup> transporting, mitochondrial F0 complex, subunit g | 93014_at    | Y17223      | 1.16   | 0.0000789      | -1.12 | 0.000625    |
| 0610007O07Rik | RIKEN cDNA 0610007O07 gene                                                     | 96653_at    | AI851762    | -1.2   | 0              | 1.19  | 0           |
| Catnb         | catenin beta                                                                   | 160430_at   | M90364      | -1.25  | 0.0000511      | 1.18  | 0           |
| Cyp2f2        | cytochrome P450, family 2, subfamily f, polypeptide 2                          | 100069_at   | M77497      | -1.34  | 0.000465       | 1.15  | 0.000517    |
| Csrp2         | cysteine-rich protein 2                                                        | 93550_at    | D88792      | -1.34  | 0.000000639    | 1.31  | 0.000974    |
| Serpina3c     | serine (or cysteine) proteinase inhibitor, clade A, member 3C                  | 102707_f_at | X61597      | -1.45  | 2.41E-09       | 1.21  | 0           |
| C730049F20Rik | RIKEN cDNA C730049F20 gene                                                     | 96038_at    | AI840339    | -1.48  | 1.76E-08       | 1.32  | 0           |
| Cox6c         | cytochrome c oxidase, subunit VIc                                              | 162319_i_at | AV071102    | -1.67  | 0.0000024      | 1.94  | 0.000881    |
| Orm1          | orosomuroid 1                                                                  | 100436_at   | M27008      | -1.73  | 0.000000089    | 1.28  | 0           |
| Cfh           | complement component factor h                                                  | 94993_f_at  | M29010      | -1.82  | 5.81E-35       | 1.26  | 0.000613    |
| AI194696      | expressed sequence AI194696                                                    | 92291_f_at  | M29008      | -1.86  | 0              | 1.21  | 0.000222    |
| Cfh           | complement component factor h                                                  | 101853_f_at | M12660      | -1.93  | 1.82E-33       | 1.26  | 0           |
| Hsd3b2        | hydroxysteroid dehydrogenase-2, delta<5>-3-beta                                | 101659_at   | M75886      | -2.5   | 2.09E-12       | 1.36  | 0           |
| Orm2          | orosomuroid 2                                                                  | 94734_at    | M12566      | -3.85  | 0.000066       | 2.1   | 0.0000576   |
| Saa2          | serum amyloid A 2                                                              | 100333_at   | M13521      | -14.29 | 2.68E-08       | 3.45  | 0.000014    |
| Saa2          | serum amyloid A 2                                                              | 103465_f_at | U60438      | -25    | 1.13E-10       | 4.5   | 0.00000543  |

<sup>a</sup>Represent p values < 10<sup>-45</sup> calculated by Rosetta Resolver.
